# Supplementary material for: Large piezoelectricity and high depolarization temperature in BiScO3–BiYbO3–PbTiO3 ceramics for energy harvesting at elevated temperatures
Source: Royal Society of Chemistry journal article supplement (doi:10.1039/d3tc03333c), 2023-01-01
Supplement: d3tc03333c1.pdf [file d3tc03333c1.pdf]

## Supporting Information

### **Large piezoelectricity and high depolarization temperature in BiScO<sub>3</sub>-BiYbO<sub>3</sub>-PbTiO<sub>3</sub> ceramics for energy harvesting at elevated temperatures**

Haiyan Zhao<sup>a,\*†</sup>, Xiaole Yu<sup>b,\*†</sup>, Qiangqiang Guo<sup>a</sup>, Huijing Yang<sup>a</sup>, Fanlin Li<sup>a</sup>, Suyang Zhang<sup>a</sup>, Xiaoyuan Wu<sup>a</sup>

<sup>a</sup> Tangshan Normal University, Tangshan 063000, China

<sup>b</sup> Faculty of Materials and Manufacturing, Beijing University of Technology, Beijing 100124, China

\* Corresponding authors.

E-mail addresses: cnzhaohy@163.com (H. Zhao), xlyu66@163.com (X. Yu)

† These authors contributed equally to this work.

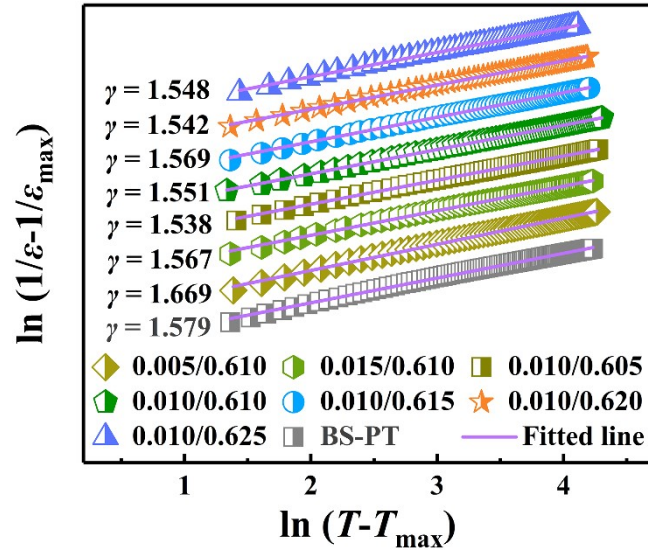

**Fig. S1**  $\ln(1/\varepsilon - 1/\varepsilon_{\max})$  as a function of  $\ln(T - T_{\max})$  at 1 kHz for the  $(1-x-y)\text{BS}-x\text{BY}-y\text{PT}$  ( $0.005 \leq x \leq 0.015$ ,  $0.605 \leq y \leq 0.625$ ) and BS-PT ceramics. The solid lines are the fitting results of Curie-Weiss relationship  $1/\varepsilon - 1/\varepsilon_{\max} = (T - T_{\max})^\gamma/C$ .

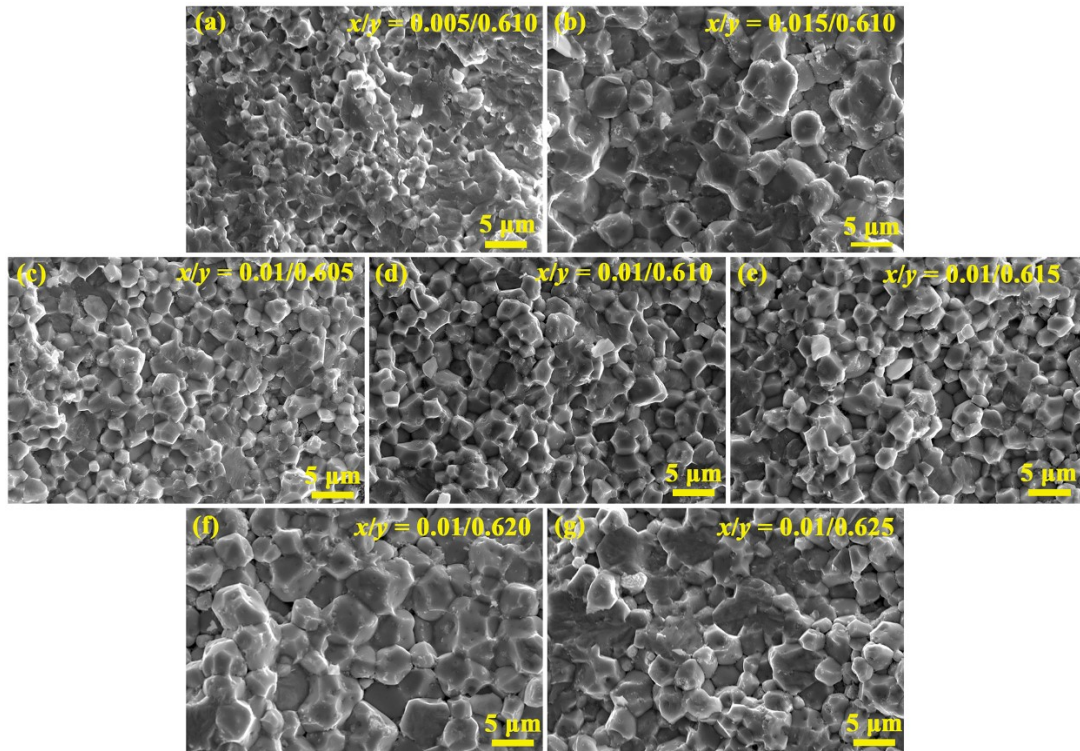

**Fig. S2** The SEM images of  $(1-x-y)\text{BS}-x\text{BY}-y\text{PT}$  ceramics: (a)  $x/y = 0.005/0.610$ , (b)  $x/y = 0.015/0.610$ , (c)  $x/y = 0.01/0.605$ , (d)  $x/y = 0.01/0.610$ , (e)  $x/y = 0.01/0.615$ , (f)  $x/y = 0.01/0.620$ , (g)  $x/y = 0.01/0.625$ .

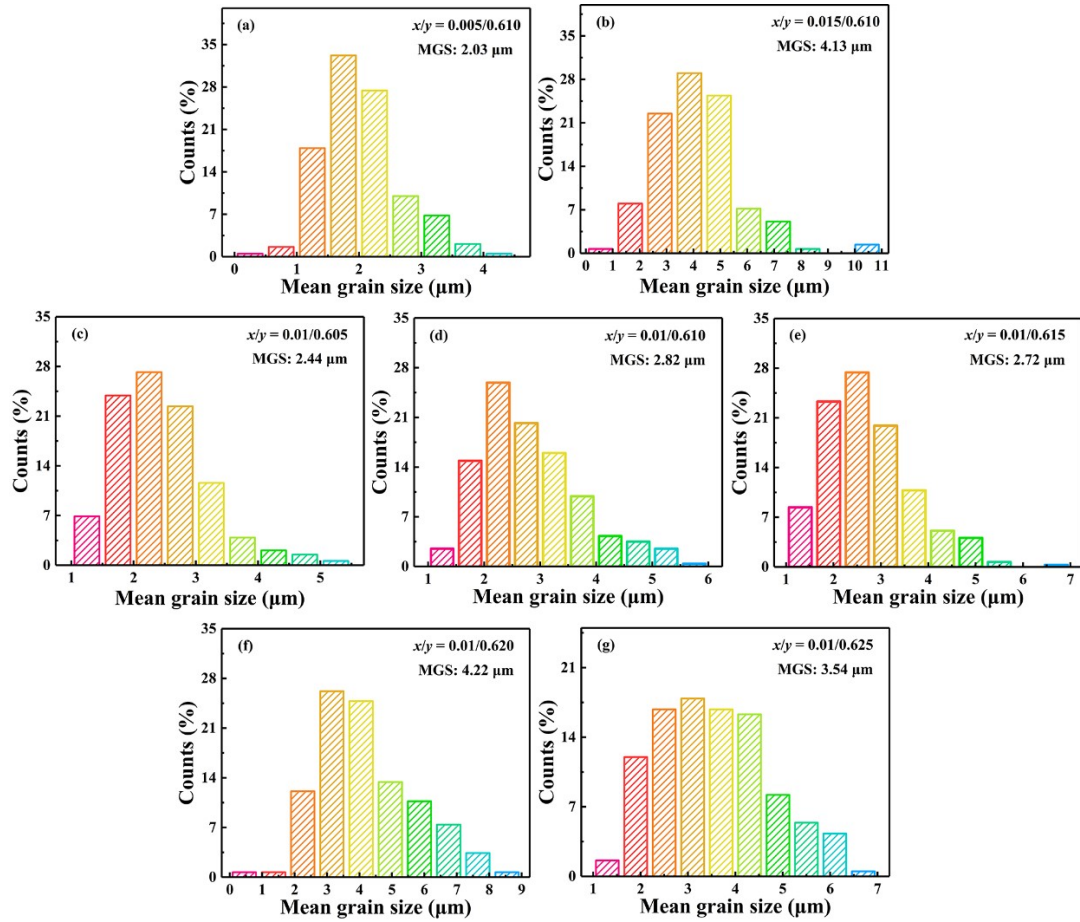

**Fig. S3** The mean grain size (MGS) distribution of  $(1-x-y)\text{BS}-x\text{BY}-y\text{PT}$  ceramics: (a)  $x/y = 0.005/0.610$ , (b)  $x/y = 0.015/0.610$ , (c)  $x/y = 0.01/0.605$ , (d)  $x/y = 0.01/0.610$ , (e)  $x/y = 0.01/0.615$ , (f)  $x/y = 0.01/0.620$ , (g)  $x/y = 0.01/0.625$ .

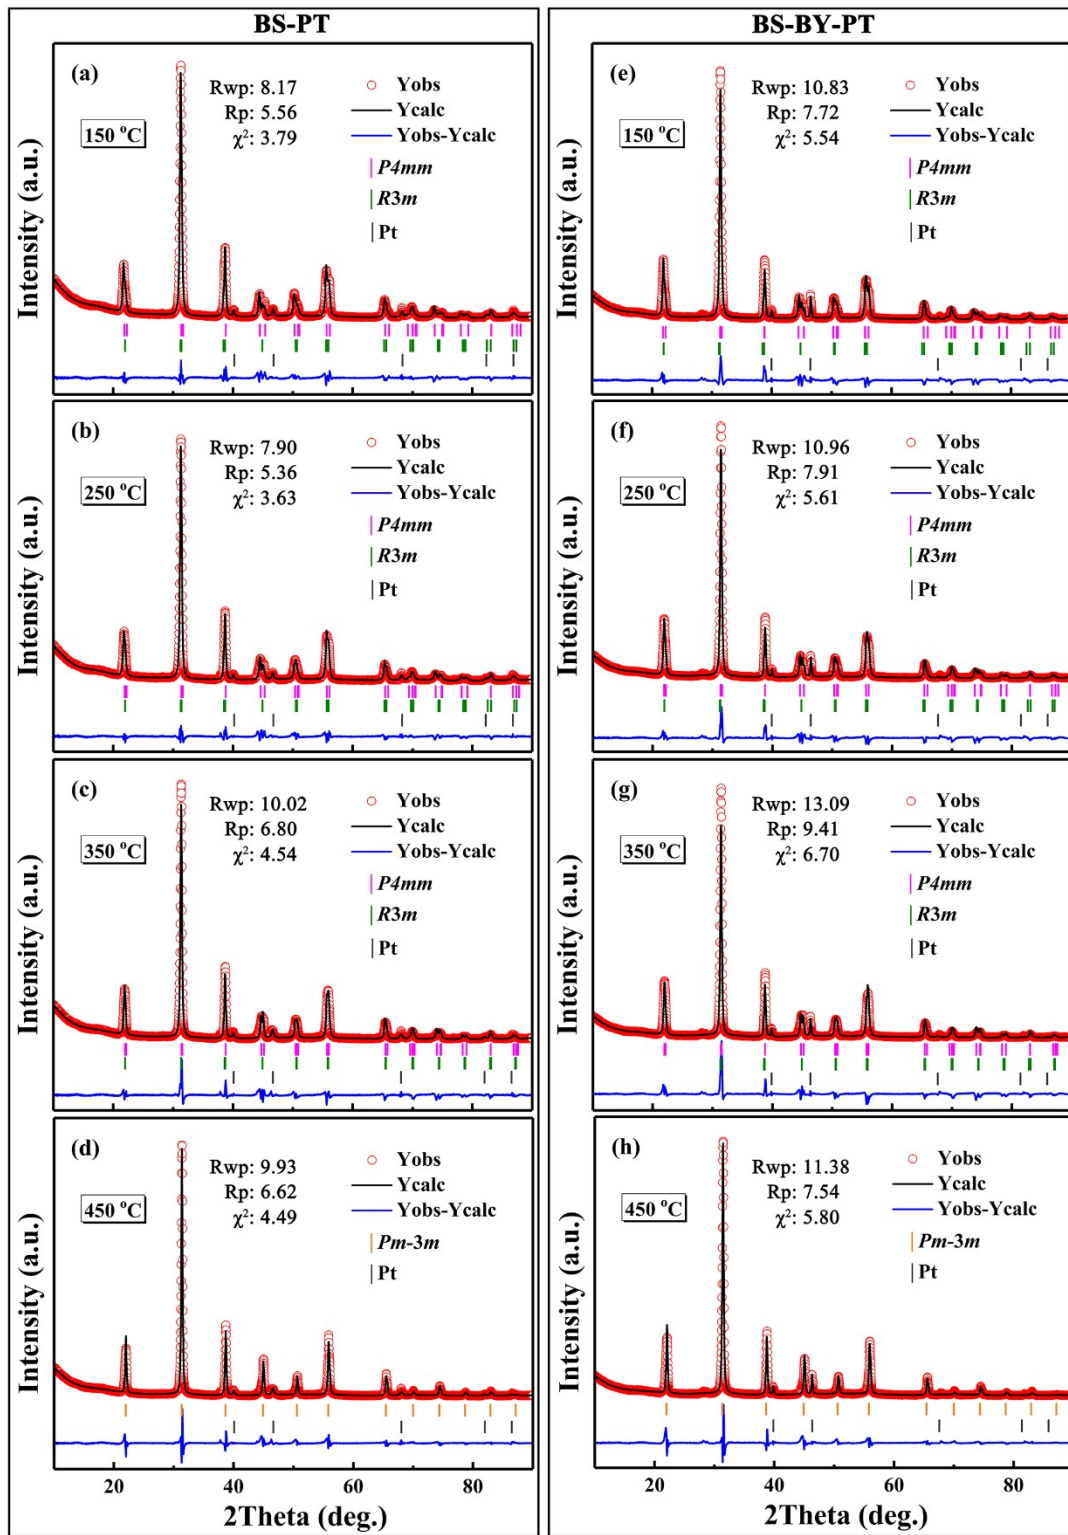

Fig. S4 Rietveld refinement of poled (a-d) BS-PT and (e-h) BS-BY-PT ceramics by an *in situ* XRD test at different temperatures. Pt diffraction peak is caused by the Pt heating substrate in the instrument test.

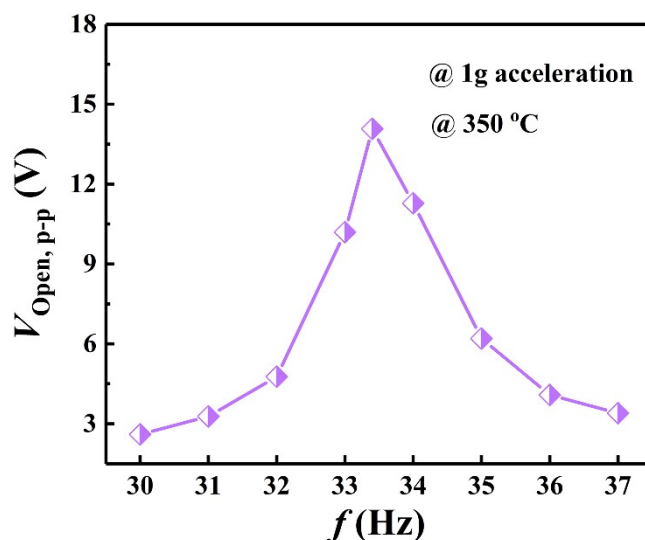

**Fig. S5** The frequency-dependent the peak-to-peak value of output open-circuit voltage ( $V_{Open, p-p}$ ) for the BS-BY-PT HT-PEH under 1g acceleration excitation at 350 °C.

The peak-to-peak value of output open-circuit voltage ( $V_{Open, p-p}$ ) of BS-BY-PT HT-PEH increases first and then decreases with test frequency ( $f$ ), and reaches the maximum value at  $\sim 33.4$  Hz, which is recorded as the resonant frequency of the BS-BY-PT HT-PEH.

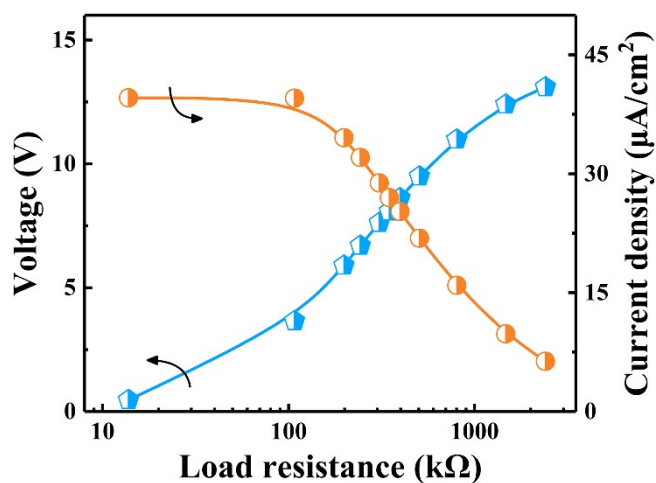

**Fig. S6** The load resistance-dependent output voltage and current density for the BS-BY-PT HT-PEH under 1g acceleration excitation at 350 °C.

When the load resistance of the connection increases, the voltage of the BS-BY-PT HT-PEH increases while the current density decreases, which conforms to Ohm's law.
